# Supplementary material for: Influence of Antihypertensive Treatment on RAAS Peptides in Newly Diagnosed Hypertensive Patients
Source: MDPI journal article supplement (doi:10.3390/cells10030534), 2021-03-03
Supplement: s1 [file s1]

**Supplementary Figure 1**

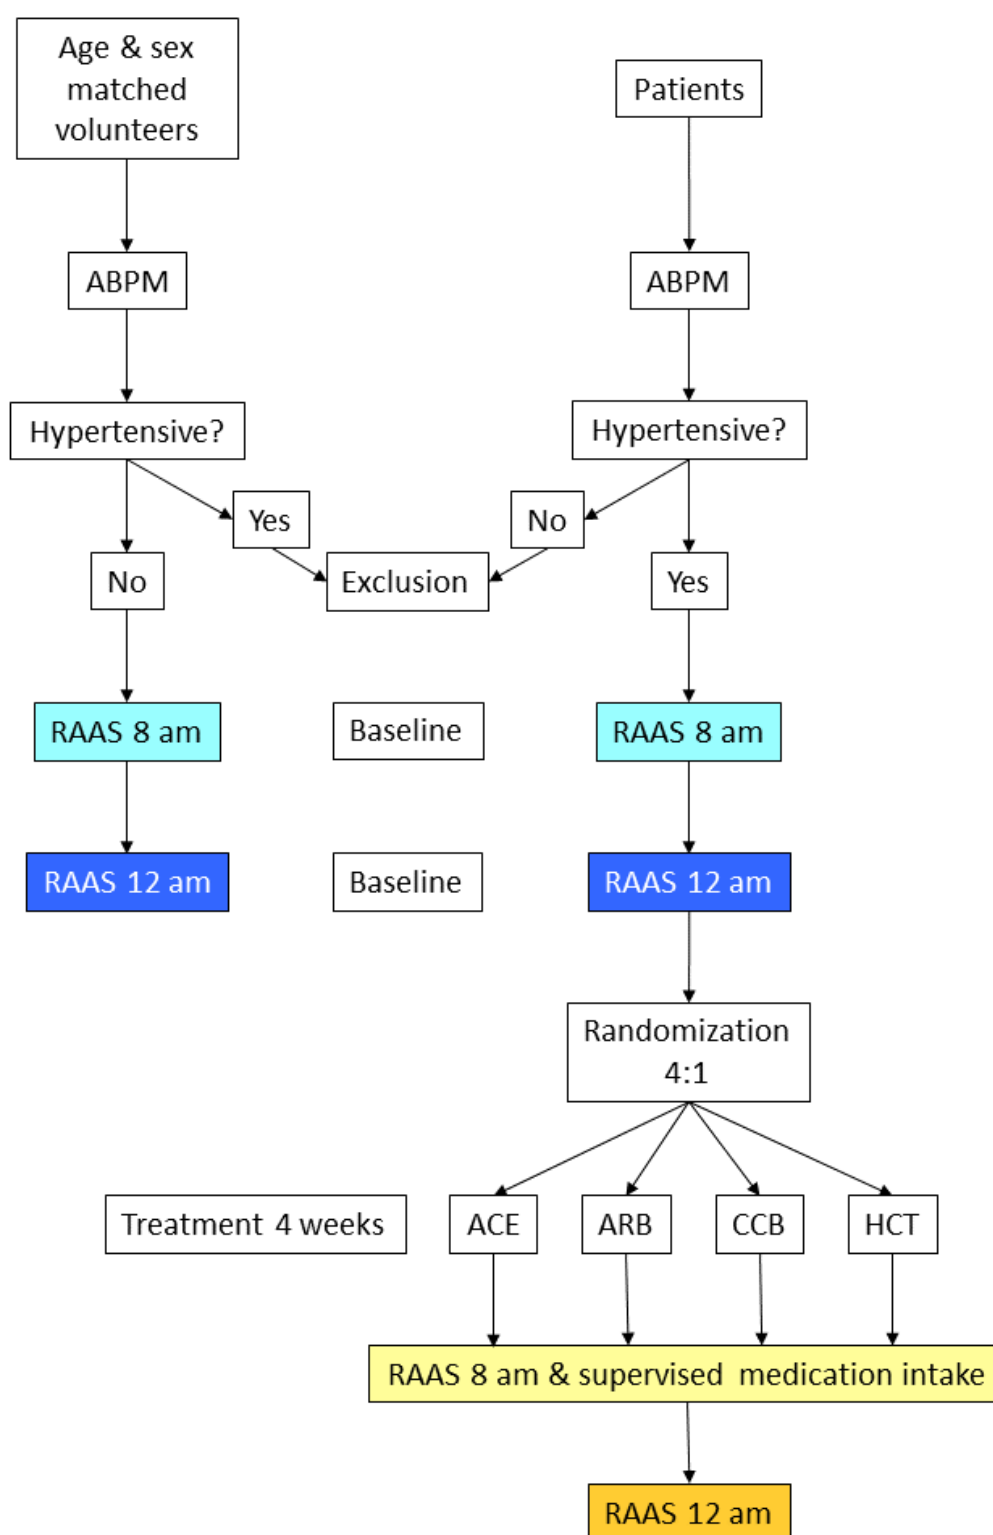

Flow chart of study procedures. ABPM = ambulatory blood pressure monitoring. RAAS = phlebotomy to measure Angiotensin II and Angiotensin (1-7) equilibrium concentrations. ACE-I = Angiotensin-converting-enzyme inhibitor (perindopril), ARB = angiotensin-receptor blocker (olmesartan), CCB = calcium channel blocker (amlodipine), HCT = hydrochlorothiazide.
